# Supplementary material
Source: publisher site journal article supplement (https://en-cdn.bio-protocol.org/attached/file/20180710/Supplementary%20file%20Calculations%20worksheet%20for%20bioprotocols%20ms.xlsx)
Supplement: Supplementary file 1 [file Supplementary%20file%20Calculations%20worksheet%20for%20bioprotocols%20ms.xlsx]

## Sheet: Sheet1
Calculation for original inoculum for soil soak assay
Example: 50 ml of 0.1 O.D. cells equals to 5 x 109 cells (0.1 O.D. corresponds to 108 CFU/ml)
no. of colonies in 10 ul spots			CFU/ml			Multiplying the dilution factor			Avg CFU/ml
30	35	40	3000	3500	4000	3000000000	3500000000	4000000000	3500000000
3.5 x 109 cells is the original inoculum
NOTE: Same calculation can be followed for checking the original inoculum for petiole inoculation, competition assay, and root attachment
Calculation for the bacterial size per gram of stem
no. of colonies in 10 ul spots			CFU/ml*			Multiplying the dilution factor**			CFU/g			Avg CFU/g
30	35	40	3000	3500	4000	300000000	350000000	400000000	3000000000	3500000000	4000000000	3500000000
* CFU/ml = 0.1 g tissue in 900 ul of water
** The dilution factor is assumed based on disease index 4 of the symptomatic plant
The average bacterial population for this plant is 3.5 x 109 cells per gram of tomato stem
Calculation for competitve index
Original inoculum size for both the competing strains that were added in 1:1 ratio via soil soak method
no. of colonies in 10 ul spots			CFU/ml			Multiplying the dilution factor			Avg
30	35	40	3000	3500	4000	3000000000	3500000000	4000000000	3500000000	Wild-type		So, the Wild-type strain is 10 times more than the mutant strain.
25	30	35	2500	3000	3500	250000000	300000000	350000000	300000000	mutant		We need to normalize the bacterial population of mutant strain recovered from the stem
Bacteria recovered from the stem after day 6 of inoculation
no. of colonies in 10 ul spots			CFU/ml*			Multiplying the dilution factor**			CFU/g			Avg CFU/g	Normalizing to original inoculum	Competition Index
30	35	33	3000	3500	3300	30000000	35000000	33000000	300000000	350000000	330000000	3.26667e+08	3.26667e+08
30	29	25	3000	2900	2500	300000	290000	250000	3000000	2900000	2500000	2800000	28000000	0.0857143
* Cfu/ml = 0.1 g tissue in 900 ul of water
** The dilution factor is assumed based on disease index of the symptomatic plant on the day of collecting the stem tissue
Competition Index = mutant/Wild-type = 2800000/326666666.7 = 0.085714
Therefore the growth fitness of the mutant strain is greatly affected as compared to Wild-type strain
Calculation of percent attached bacterial cells to tomato roots
Original inoculum
	no. of colonies in 10 ul spot				cfu/ml			Multiplying the dilution factor			10ul spotted over 2 cm			cells spotted per cm			Avg
Wild-type	31	43	31		3100	4300	3100	3100000	4300000	3100000	31000	43000	31000	15500	21500	15500	17500
Mutant	26	18	27		2600	1800	2700	2600000	1800000	2700000	26000	18000	27000	13000	9000	13500	11833.3
Counting the bacterial cells recovered after 2 hours of attachment
	no. of colonies in 10 ul spot				cfu/300ul*			Multiplying the dilution factor			cfu/cm**			Avg	ratio of recovered cells vs original no. of cells	percentage of cells attaching
Wild-type	27	34	30		810	1020	900	8100	10200	9000	1012.5	1275	1125	1137.5	0.065	6.5
Mutant	20	15	17		600	450	510	60000	45000	51000	7500	5625	6375	6500	0.549296	54.9296
* inoculated roots are ground in 300ul of water
** dividing by 8 because we pooled 4 roots each of size 2 cm
